# Supplementary material for: Multimodal Capture of Patient Behaviour for Improved Detection of Early Dementia: Clinical Feasibility and Preliminary Results
Source: Frontiers journal article supplement (doi:10.3389/fcomp.2021.642633), 2021-04-19
Supplement: Table_2.pdf [file Table_2.pdf]

**Table 2.** A summary table of what physiological and behavioural measures can be extracted from each modality, an indication of which ones are used in the correlation analysis and an indication if the measure is task independent.

| Modality               | Measure                      | Part of preliminary analysis | Task independent |
|------------------------|------------------------------|------------------------------|------------------|
| Facial gestures        | Mean face velocity           | ✓                            | ✓                |
|                        | Mean smile                   | ✓                            | ✓                |
|                        | Mean brow                    | ✓                            | ✓                |
|                        | Mean jaw                     | ✓                            | ✓                |
|                        | Head motion                  | ✓                            | ✓                |
|                        | Facial gaze measurements     | ✓                            | ✓                |
|                        | Facial patterns              | X                            | ✓                |
|                        | Emotion expression           | X                            | ✓                |
| Gaze                   | Number of fixations          | ✓                            | X                |
|                        | Mean fixation duration       | ✓                            | X                |
|                        | Number of reading fixations  | ✓                            | X                |
|                        | Number of reading backtrack  | ✓                            | X                |
|                        | Percent backtrack            | ✓                            | X                |
| Hand motion            | Gait                         | X                            | ✓                |
|                        | Hand movement                | X                            | X                |
| Heart rate             | Heart rate variability       | ✓                            | ✓                |
|                        | Heart rate change over time  | X                            | ✓                |
| Language               | Average word length          | ✓                            | ✓                |
|                        | Unique words                 | ✓                            | ✓                |
|                        | Part-of-speech-tagging       | ✓                            | ✓                |
|                        | Word complexity              | X                            | ✓                |
|                        | TFIDF-vectors                | X                            | ✓                |
| Pen motion & pressure  | Drawing speed                | ✓                            | X                |
|                        | Pen pressure                 | ✓                            | X                |
| Pupil dilation         | Pupil change                 | ✓                            | X                |
|                        | Pupil diameter               | ✓                            | X                |
| Galvanic Skin Response | Electro-dermal activity      | X                            | ✓                |
| Thermal emission       | Head temperature change      | ✓                            | ✓                |
|                        | Breathing                    | X                            | ✓                |
| Video                  | Skin color changes over time | X                            | ✓                |
|                        | Posture                      | X                            | ✓                |
|                        | Body movement                | X                            | ✓                |
| Voice                  | <i>h1h2</i> (Voice quality)  | ✓                            | ✓                |
|                        | <i>h1h3</i> (Voice quality)  | ✓                            | ✓                |
|                        | <i>h1a1</i> (Voice quality)  | ✓                            | ✓                |
|                        | <i>h1a2</i> (Voice quality)  | ✓                            | ✓                |
|                        | <i>h1a3</i> (Voice quality)  | ✓                            | ✓                |
|                        | Average pause length         | ✓                            | ✓                |
|                        | Mean long pause length       | ✓                            | ✓                |
|                        | Pause count                  | ✓                            | ✓                |
