# Supplementary material for: Multimodal Capture of Patient Behaviour for Improved Detection of Early Dementia: Clinical Feasibility and Preliminary Results
Source: Frontiers journal article supplement (doi:10.3389/fcomp.2021.642633), 2021-04-19
Supplement: Table_3.pdf [file Table_3.pdf]

**Table 3.** Summary table of clinical assessment metrics available, and an indication of which ones are used in the correlation analysis.

| Modality                 | Assessment                                 | Part of preliminary analysis |
|--------------------------|--------------------------------------------|------------------------------|
| Medical assessment       | Diagnosis                                  | ✓                            |
|                          | Moca-Mis                                   | ✓                            |
|                          | MOCA                                       | ✗                            |
|                          | PHQ9                                       | ✗                            |
|                          | Background variables                       | ✗                            |
| Spinal tap               | Phosphorus Tau                             | ✓                            |
|                          | Ab42                                       | ✓                            |
|                          | Tau                                        | ✗                            |
|                          | Ab42Ab40                                   | ✗                            |
|                          | Ab42Ptau                                   | ✗                            |
|                          | NFL                                        | ✗                            |
| Neuropsychological tests | MMSE                                       | ✗                            |
|                          | RAVLT delayed recall                       | ✗                            |
|                          | Rey complex figure                         | ✗                            |
|                          | WAIS Digit Symbol—Coding                   | ✗                            |
| MRI <sup>1</sup>         | Hippocampus total volume                   | ✓                            |
|                          | Hippocampus (Left, Right)                  | ✗                            |
|                          | Lateral ventricle (Left, Right)            | ✗                            |
|                          | Cerebellar vermal lobules (Left, Right)    | ✗                            |
|                          | Cerebrospinal fluid                        | ✗                            |
|                          | Medial temporal lobe atrophy (Left, Right) | ✗                            |
|                          | Cerebral cortex left GCA                   | ✗                            |
|                          | Frontal lobe (Left, Right) GCA             | ✗                            |
|                          | Temporal lobe left GCA                     | ✗                            |
|                          | Parietal lobe left GCA                     | ✗                            |

<sup>1</sup>We have relative volume measurements for 248 brain regions. We list regions with an absolute correlation with diagnosis  $> 0.7$
