# Supplementary material for: Multimodal Capture of Patient Behaviour for Improved Detection of Early Dementia: Clinical Feasibility and Preliminary Results
Source: Frontiers journal article supplement (doi:10.3389/fcomp.2021.642633), 2021-04-19
Supplement: Table_4.pdf [file Table_4.pdf]

**Table 4.** A demographic table with age, gender and education level for participants based on diagnostic group.

| Demographic variable | Healthy                               | MCI                             | Alzheimer                        |
|----------------------|---------------------------------------|---------------------------------|----------------------------------|
| Diagnostic group     | 14 (56%)                              | 7 (28%)                         | 4 (16%)                          |
| Age                  | 60 (avg)<br>3.39 (std)                | 64.57 (avg)<br>4.11 (std)       | 64 (avg)<br>3.9 (std)            |
| Gender               | 11 Females (78.5%)<br>3 Males (21.5%) | 1 Female (14%)<br>6 Males (86%) | 4 Females (100%)<br>0 Males (0%) |
| Education level      | 15.07 (avg)<br>3.25 (std)             | 14.14 (avg)<br>3.57 (std)       | 10.25 (avg)<br>1.5 (std)         |
